# Supplementary material for: Risk Adjustment in Health Insurance Exchanges for Individuals With Mental Illness
Source: Atypon-hosted journal article supplement (doi:10.1176/appi.ajp.2012.11071044), 2012-05-11
Supplement: appi.ajp.2012.11071044.ds001.pdf [file appi.ajp.2012.11071044.ds001.pdf]

## Data Supplement: Tables S1 and S2

**TABLE S1. Characteristics of Sample Compared with U.S. Population (N=5 million)**

|                   | Unweighted Sample<br>(N=5 million) | Weighted Sample<br>(N=45.93 million) | U.S. Uninsured<br>Population (N=45.7<br>million) |
|-------------------|------------------------------------|--------------------------------------|--------------------------------------------------|
| Age group (years) |                                    |                                      |                                                  |
| ≤18               | 28.65%                             | 17.82%                               | 17.7%                                            |
| 19–24             | 8.35%                              | 16.37%                               | 16.4%                                            |
| 25–34             | 13.21%                             | 23.49%                               | 23.5%                                            |
| 35–44             | 16.86%                             | 17.54%                               | 17.6%                                            |
| 45–54             | 19.04%                             | 15.40%                               | 15.4%                                            |
| 55–64             | 13.89%                             | 9.39%                                | 9.4%                                             |
| Gender            |                                    |                                      |                                                  |
| Male              | 50.96%                             | 52.28%                               | 54.6%                                            |
| Female            | 49.04%                             | 47.72%                               | 45.4%                                            |
| Region            |                                    |                                      |                                                  |
| Northeast         | 23.58%                             | 19.45%                               | 19.4%                                            |
| Midwest           | 28.58%                             | 15.73%                               | 15.7%                                            |
| South             | 22.31%                             | 31.47%                               | 31.5%                                            |
| West              | 25.53%                             | 33.35%                               | 33.3%                                            |

Note: Estimate of uninsured population in the U.S. derived from Kaiser Commission on Medicaid and the Uninsured: The Uninsured: A Primer. Key Facts about Americans without Health Insurance, December 2010. <http://www.kff.org/uninsured/7451.cfm> (last accessed June 9, 2011).

**TABLE S2. Ratios of Predicted to Actual Health Care Expenditures in Risk Adjustment Models for Health Plan Cohorts by Share of Individuals with Chronic Mental Health and Medical Conditions with and without Reinsurance**

|                           | Without Reinsurance                                       |             |                                                     |             | With Reinsurance                                          |             |                                                     |             |
|---------------------------|-----------------------------------------------------------|-------------|-----------------------------------------------------|-------------|-----------------------------------------------------------|-------------|-----------------------------------------------------|-------------|
|                           | Risk Level by Share With Chronic Mental Health Conditions |             | Risk Level by Share With Chronic Medical Conditions |             | Risk Level by Share With Chronic Mental Health Conditions |             | Risk Level by Share With Chronic Medical Conditions |             |
|                           | Predictive Ratio                                          | Range       | Predictive Ratio                                    | Range       | Predictive Ratio                                          | Range       | Predictive Ratio                                    | Range       |
| Low morbidity             | 1.015                                                     | 0.984–1.053 | 1.024                                               | 0.992–1.070 | 1.012                                                     | 0.989–1.041 | 1.019                                               | 0.995–1.047 |
| Moderately low morbidity  | 1.000                                                     | 0.964–1.032 | 0.999                                               | 0.964–1.028 | 1.001                                                     | 0.981–1.022 | 0.998                                               | 0.977–1.024 |
| Moderately high morbidity | 0.996                                                     | 0.977–1.038 | 0.998                                               | 0.969–1.030 | 0.996                                                     | 0.975–1.033 | 0.998                                               | 0.977–1.029 |
| High morbidity            | 0.992                                                     | 0.965–1.021 | 0.985                                               | 0.960–1.012 | 0.993                                                     | 0.974–1.019 | 0.987                                               | 0.968–1.007 |

Note: Health plan cohorts created by simulating enrollment for 100 health plans, each with 50,000 random members. We reassigned a predetermined number of individuals to plans based on the presence of chronic mental health conditions to create four plan risk levels with 25 plans in each: low morbidity, moderately low morbidity, moderately high morbidity, high morbidity. We used an analogous process to reassign a predetermined number of individuals to plans based on the presence of chronic medical conditions, again creating four plan risk levels with 25 plans in each.
